# Supplementary material
Source: publisher figshare collection journal article supplement (https://gsajournals.figshare.com/ndownloader/files/17818394)
Supplement: Supplementary file 1 [file 17818394]

## Sheet: Sheet1
qRT PCR primers used for validating differentially expressed genes in wt, ∆fpr3, ∆fpr4, ∆fpr3∆fpr4 cells
Gene	Forward/ Reverse	Sequence (5'-3')
PHO5	forward	TTGTAACTCATGTCCTGCTTGG
PHO5	reverse	TCAATCTCTTGGCAATGTCATC
PHO84	forward	TCTGTACCATTCTGCAAACCAC
PHO84	reverse	AGTCACCACCGATACCAATACC
SIT1	forward	TCTATTAGGTTTCGGTGCAGGT
SIT1	reverse	GAGGTTACTACCGCCATTCTTG
TCM1	forward	ACCTCCATTAACCACAAGATTTACA
TCM1	reverse	AGTCGTTCTTAATTTCACCGTAGTG
GPD1	forward	AGAAACGTCAAGGTTGCTAGGC
GPD1	reverse	GGCCATTCAACAACTCCTTTTC
qRT PCR primers used for validating incomplete elongation ∆fpr3∆trf5 and ∆fpr3∆fpr4∆trf5 cells
Gene	Forward/ Reverse	Sequence (5'-3')
UTP9 (5' end)	forward	TTTGGATTTGGTGGCGAGCTTC
UTP9 (5' end)	reverse	ATTGTTCTTTTGTGCGACGCTT
UTP9 (3' end)	forward	AGAAATGTTGAGGAGGCAAGCA
UTP9 (3' end)	reverse	TCAAGCTTTTCAACAGGCGATG
SSF1 (5' end)	forward	ATGGCCAAGAGAAGACAAAAGA
SSF1 (5' end)	reverse	GATTTGGCGGAAGTCCTTTACT
SSF1 (3' end)	forward	AAGAAGAAAAGCTAGAGCAGCAGA
SSF1 (3' end)	reverse	GCTACCATAATGTTCGCTGTCA
ACT1 (5' end)	forward	AGGTTGCTGCTTTGGTTATTGA
ACT1 (5' end)	reverse	CTACCGACGATAGATGGGAAGA
ACT1 (3' end)	forward	TGGTGGTTCTATCTTGGCTTCT
ACT1 (3' end)	reverse	AACACTTGTGGTGAACGATAGATG
GPD1	forward	AGAAACGTCAAGGTTGCTAGGC
GPD1	reverse	GGCCATTCAACAACTCCTTTTC
